# Supplementary material for: Protective mechanism of Erigeron breviscapus injection on blood–brain barrier injury induced by cerebral ischemia in rats
Source: PubMed Central journal article supplement (PMC8446017; doi:10.1038/s41598-021-97908-x), 2021-09-16
Supplement: 41598_2021_97908_MOESM1_ESM.pdf [file 41598_2021_97908_MOESM1_ESM.pdf]

1

# Supplementary Materials

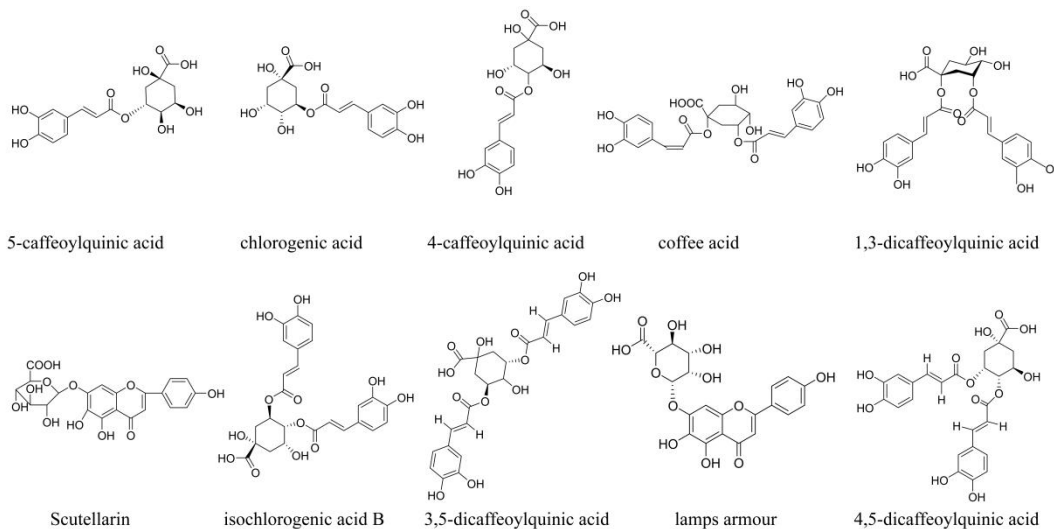

2

3

**Supplementary figure 1** The chemical structures of the ten components.

4

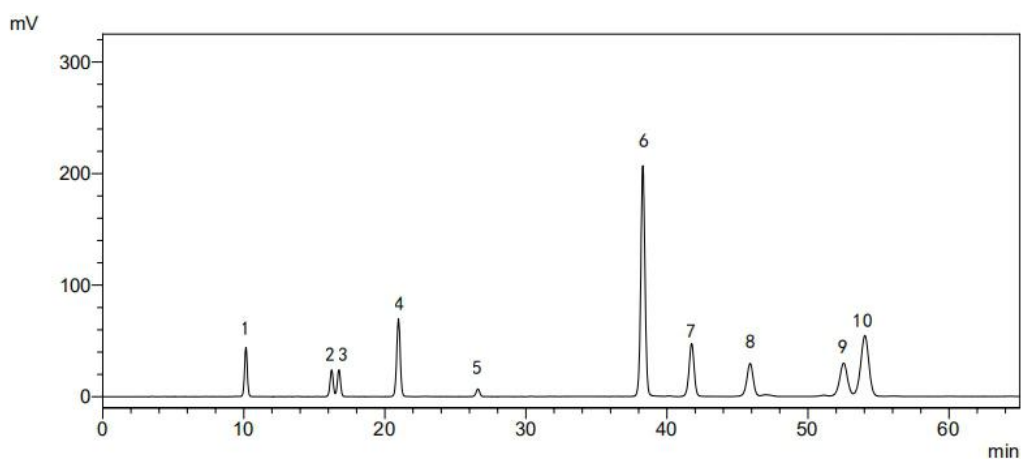

5

6 (1 5-caffeoylquinic acid; 2 chlorogenic acid; 3 4-caffeoylquinic acid; 4 coffee acid; 5

7 1,3-dicaffeoylquinic acid; 6 Scutellarin; 7 isochlorogenic acid B; 8

8 3,5-dicaffeoylquinic acid; 9 lamps armour; 10 4,5-dicaffeoylquinic acid)

9 **Supplementary figure 2** HPLC analysis of the test solution

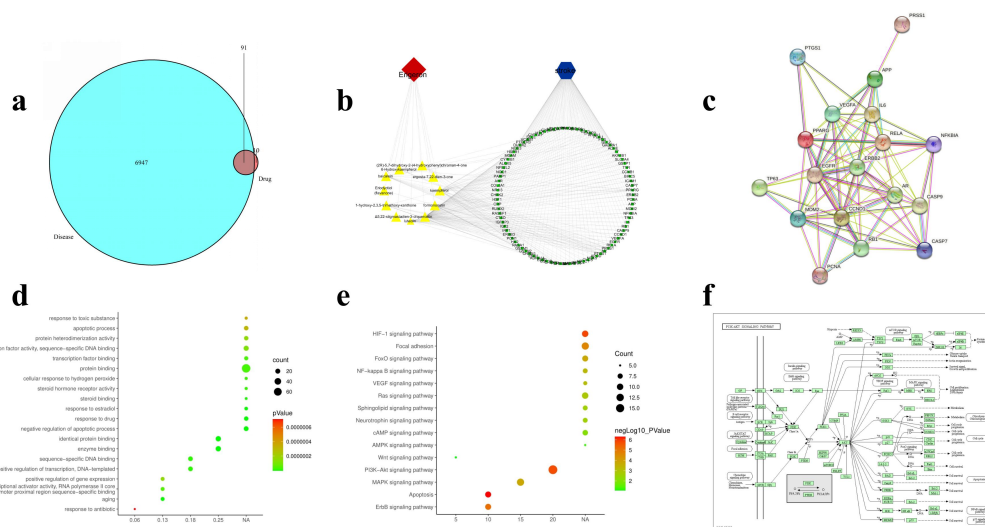

10  
 11 **Supplementary figure 3** Network pharmacological study on cerebral ischemia  
 12 treated by *Erigeron breviscapus*.(a)Drug target-disease target related target  
 13 map.(b)The construction and analysis diagram of the chemical  
 14 composition-target-ischemic stroke interactive network.(c)Target gene interaction  
 15 mapping.(d)GO enrichment analysis.(e)KEGG enrichment analyses.(f)“PI3K-Akt  
 16 signaling pathway”signal path diagram.

17  
 18 **Supplementary table 1** Gradient elution program

| Number | Time(min) | A(0.4% phosphoric acid, %) | B(acetonitrile, %) |
|--------|-----------|----------------------------|--------------------|
| 1      | 0         | 90                         | 10                 |
| 2      | 25        | 83                         | 17                 |
| 3      | 26        | 80                         | 20                 |
| 4      | 65        | 80                         | 20                 |

19  
 20 **Supplementary table 2** Effective chemical constituents of *Erigeron breviscapus*

| Mol ID    | Molecule Name                                       | OB (%) | DL   |
|-----------|-----------------------------------------------------|--------|------|
| MOL000006 | luteolin                                            | 36.16  | 0.25 |
| MOL000098 | quercetin                                           | 46.43  | 0.28 |
| MOL000392 | formononetin                                        | 69.67  | 0.21 |
| MOL000422 | kaempferol                                          | 41.88  | 0.24 |
| MOL000816 | ergosta-7,22-dien-3-one                             | 44.88  | 0.72 |
| MOL001040 | (2R)-5,7-dihydroxy-2-(4-hydroxyphenyl)chroman-4-one | 42.36  | 0.21 |
| MOL002712 | 6-Hydroxykaempferol                                 | 62.13  | 0.27 |
| MOL002714 | baicalein                                           | 33.52  | 0.21 |
| MOL002914 | Eriodyctiol (flavanone)                             | 41.35  | 0.24 |
| MOL007963 | 1-hydroxy-2,3,5-trimethoxy-xanthone                 | 101.06 | 0.30 |
| MOL007984 | $\Delta^5,22$ -stigmastadien-3-ol                   | 43.83  | 0.76 |

21

22

23  
24

**Supplementary table 3** Related targets of *Erigeron breviscapus* for potential treatment of ischemic stroke

| Gene Name | Gene Name | Gene Name | Gene Name |
|-----------|-----------|-----------|-----------|
| PTGS1     | AR        | PRSS1     | RELA      |
| EGFR      | VEGFA     | CCND1     | CASP9     |
| RB1       | IL6       | TP63      | NFKBIA    |
| MDM2      | APP       | PCNA      | ERBB2     |
| PPARG     | CASP7     | ICAM1     | BIRC5     |
| CCNB1     | TYR       | GSTP1     | SLC2A4    |
| AKR1B1    | F7        | ACHE      | GABRA1    |
| BCL2      | FOS       | PLAU      | AHSA1     |
| CASP3     | ELK1      | POR       | CASP8     |
| RAF1      | PRKCA     | HIF1A     | RUNX1T1   |
| ACACA     | CYP3A4    | CAV1      | MYC       |
| CYP1A1    | SELE      | VCAM1     | PTGER3    |
| DUOX2     | NOS3      | HSPB1     | MGAM      |
| CYP1B1    | ALOX5     | NFE2L2    | NQO1      |
| PARP1     | AHR       | COL3A1    | NR1H3     |
| CHEK2     | HSF1      | CRP       | RUNX2     |
| RASSF1    | CTSD      | IGFBP3    | IGF2      |
| IRF1      | ERBB3     | PON1      | HK2       |
| RASA1     | GSTM1     | GSTM2     | CHRM1     |
| ESR1      | ADRA1A    | ESR2      | GSK3B     |
| CHEK1     | PGR       | CHRM2     | IKBKB     |
| MAPK8     | AKR1C3    | NR3C2     | NR3C1     |
| CYCS      | NOX5      | APOD      |           |

25
