# Supplementary material for: Protective mechanism of Erigeron breviscapus injection on blood–brain barrier injury induced by cerebral ischemia in rats
Source: PubMed Central journal article supplement (PMC8446017; doi:10.1038/s41598-021-97908-x), 2021-09-16

**Protective mechanism of *Erigeron breviscapus* injection on  
blood-brain barrier injury induced by cerebral ischemia in  
rats**

***Guangli Liu<sup>1,2</sup>, Yan Liang<sup>1</sup>, Min Xu<sup>1</sup>, Ming Sun<sup>1</sup>, Weijun Sun<sup>1</sup>, You Zhou<sup>1</sup>, Xiaojuan Huang<sup>3</sup>,  
Wenjie Song<sup>3</sup>, Yuan Liang<sup>1</sup>, Zhang Wang<sup>3\*</sup>***

*1. College of Pharmacy, Chengdu University of Traditional Chinese Medicine, Chengdu, Sichuan, 611137, China;*

*2. Hospital Pharmaceutical Department, Xuzhou Maternity and Child Health Care Hospital, Xuzhou, Jiangsu, 221000, China;*

*3. College of Ethnomedicine, Chengdu University of Traditional Chinese Medicine, Chengdu, Sichuan, 611137, China*

*\*Correspondence: Zhang Wang, E-mail: wangzhangcqd@cdutcm.edu.cn, Tel: +86 28 61656141.*

$\beta$ -actin

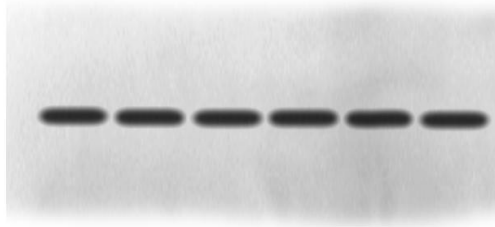

iNOS

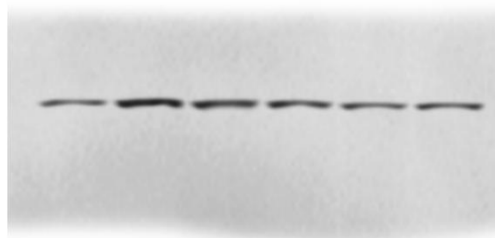

MMP-9

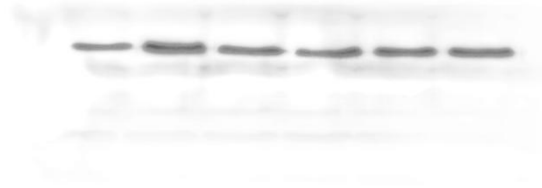

claudin-5

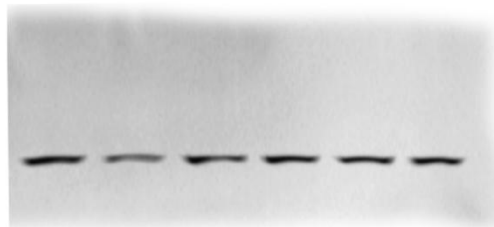

occludin

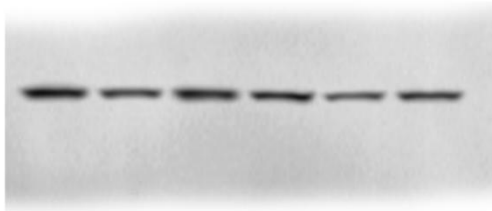

ZO-1

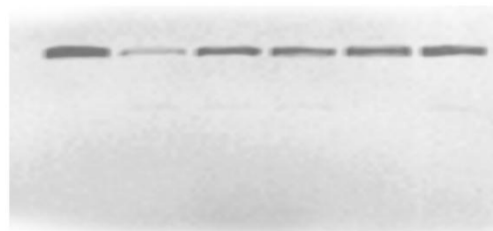

Supplement: 41598_2021_97908_MOESM2_ESM.pdf [file 41598_2021_97908_MOESM2_ESM.pdf]
